# Supplementary material for: A novel therapeutic strategy for esophageal varices using endoscopic treatment combined with splenic artery embolization according to the Child-Pugh classification
Source: PLoS One. 2019 Sep 26;14(9):e0223153. doi: 10.1371/journal.pone.0223153 (PMC6762126; doi:10.1371/journal.pone.0223153)
Supplement: S1 File — (XLSX) [file pone.0223153.s001.xlsx]

## Sheet: Supporting information
Pt. No.	Age	Sex	Sex M=0, F=1	Etiology	Etiology HBV+HCV=0, Alc+NASH=1, Other=2	CP score	CP class	CP A=0, B=1, C=2	eGFR	PSE Absent=0, Present=1	Timing of PSE	Platelet	Procedure	Procedure EVL=0, EIS=1	Form	RC sign	No. of ETs Initial=0, Retreatment=1	HCC Absent=0, Present=1	HCC stage	Rec. (oveall) Absent=0, Present=1, Cancel (Drop out/Death)=2		month	week	1Y Rec. Absent=0, Present=1	2Y Rec. Absent=0, Present=1, Cancel at 2Y (Drop out/Death)=2	3Y Rec. Absent=0, Present=1, Cancel at 3Y (Drop out/Death)=2
1	56	M	0	Alc	1	6	A	0	90.3	0		11	EIS	1	2	0	0	0		1	rupture	53	232	0	0	0
2	73	F	1	nBnC	2	11	C	2	100.2	0		10	EVL	0	2	2	0	0		1		3	13	1	1	1
3	74	M	0	HCV	0	6	A	0	79.6	0		8.1	EIS	1	1	1	1	0		1		26	117	0	0	1
4	77	M	0	NASH	1	8	B	1	97.5	0		11.5	EIS	1	2	2	1	0		0		21	94	0	2	2
5	71	M	0	HCV	0	9	B	1	60.4	0		5.6	EIS	1	3	3	0	1	III	1	rupture	17	77	0	1	1
6	62	M	0	Alc	1	8	B	1	44.5	0		16.3	EIS	1	2	1	0	0		1		15	66	0	1	1
7	73	M	0	Alc	1	6	A	0	84	0		12.3	EIS	1	2	2	0	1	I	0		37	163	0	0	0
8	62	M	0	HCV	0	8	B	1	74.7	0		11.1	EIS	1	2	2	0	1	II	1		19	86	0	1	1
9	75	M	0	HCV	0	7	B	1	55	0		4.5	EIS	1	2	3	1	1	II	1		14	64	0	1	1
10	70	F	1	HBV/HCV past-infection	2	5	A	0	36	0		7.7	EIS	1	3	1	0	1	II	0		19	84	0	2	2
11	51	M	0	Alc	1	5	A	0	79	0		13.2	EIS	1	2	0	0	0		0		60	262	0	0	0
12	79	M	0	HCV	0	6	A	0	57.9	0		7.1	EIS	1	2	0	0	1	I	1	rupture	7	32	1	1	1
13	61	F	1	EHO	2	5	A	0	81.5	0		2.4	EIS	1	2	0	0	0		1		18	80	0	1	1
14	78	F	1	HCV	0	6	A	0	38.7	0		10	EIS	1	2	1	0	1	IVa	0		20	89	0	2	2
15	63	M	0	nBnC	2	5	A	0	71.5	0		9.1	EIS	1	2	3	0	0		1		9	41	1	1	1
16	66	M	0	Alc	1	7	B	1	81	0		8.6	EIS	1	2	2	0	1	IVa	1	rupture	2	10	1	1	1
17	84	F	1	nBnC	2	5	A	0	42.7	0		12	EIS	1	2	0	0	1	III	1		18	79	0	1	1
18	66	F	1	Alc	1	5	A	0	52.8	0		6.1	EIS	1	2	1	1	0		0		61	268	0	0	0
19	66	M	0	HCV	0	5	A	0	48.6	0		14.4	EIS	1	2	2	0	1	I	1		37	163	0	0	0
20	61	M	0	Alc	1	9	B	1	58.3	0		12.7	EIS	1	2	1	0	0		1	rupture	6	27	1	1	1
21	79	M	0	HCV	0	5	A	0	79.3	0		4.9	EIS	1	2	1	0	1	II	0		17	75	0	2	2
22	80	F	1	HCV	0	5	A	0	70	0		8.5	EIS	1	2	2	1	0		0		47	204	0	0	0
23	60	F	1	HCV	0	9	B	1	88.7	0		11.5	EVL	0	2	1	0	0		0		14	63	0	2	2
24	78	M	0	Alc	1	5	A	0	63.1	0		12.8	EIS	1	2	2	1	0		0		23	100	0	2	2
25	64	F	1	HBV	0	5	A	0	106.7	0		12.8	EIS	1	2	1	0	0		0		29	127	0	0	2
26	53	M	0	Alc	1	9	B	1	91.7	0		5.3	EIS	1	1	1	0	0		1	rupture	11	47	1	1	1
27	79	F	1	PBC	2	5	A	0	57.7	0		8.6	EIS	1	2	0	0	0		0		40	177	0	0	0
28	77	M	0	nBnC	2	5	A	0	101.2	0		7.8	EIS	1	3	2	0	0		1		37	163	0	0	0
29	54	M	0	NASH	1	7	B	1	58.5	0		11.5	EIS	1	2	2	0	0		0		46	201	0	0	0
30	60	M	0	HBV	0	5	A	0	71.6	0		7.3	EIS	1	1	2	1	1	I	1		42	182	0	0	0	Splenic volume (pre-PSE)	Splenic infarction rate	Splenic infarction volume	WHVP (pre-PSE)	WHVP (post-PSE)	HVPG (pre-PSE)	HVPG (post-PSE)	CP score (pre-PSE)	CP score (post-PSE)	Plt (pre-PSE)	Plt (post-PSE)
31	62	M	0	HBV	0	5	A	0	103.8	1	PSE before ET	12.4	EIS	1	2	1	1	1	III	0		74	322	0	0	0	462.54	70.63	421.74	260	245	135	120	5	6	6.4	12.6
32	64	F	1	HCV	0	5	A	0	72	1	PSE before ET	6.1	EIS	1	2	0	0	0		2		49	214	0	0	0	384.05	58.27	244.98	255	225	130	80	7	6	4.6	9.5
33	76	M	0	NASH	1	9	B	1	83	1	PSE before ET	7	EVL	0	1	1	1	0		0		34	148	0	0	2	447.46	79.27	436.7	-	-	-	-	9	7	3.1	6.8
34	81	F	1	HCV	0	5	A	0	69.5	1	PSE after ET	3.9	EIS	1	2	2	1	0		2		30	133	0	0	2	422.64	81.25	515.4	295	260	225	165	5	5	4.8	10.3
35	72	M	0	HCV	0	9	B	1	99.4	1	PSE before ET	7.1	EIS	1	3	2	0	1	III	2		29	128	0	0	2	847	58	493.8	275	245	225	200	9	8	3.4	7.7
36	62	F	1	HCV	0	9	B	1	74.3	1	PSE after ET	2.2	EIS	1	2	1	1	0		1		19	82	0	1	1	859.49	55	612.4	270	195	180	105	10	8	3.2	4.9
37	63	M	0	HCV	0	6	A	0	77.5	1	PSE before ET	8.2	EIS	1	2	1	0	1	III	2		33	144	0	0	2	542.16	65.36	465.88	-	-	-	-	7	7	5.9	8.6
38	66	M	0	Alc	1	6	A	0	67.9	1	PSE before ET	7.6	EIS	1	2	2	1	0		0		57	250	0	0	0	609.29	76.3	574.49	280	-	135	-	6	6	3.1	7.6
39	57	F	1	Overlap	2	7	B	1	70	1	PSE after ET	9	EIS	1	3	2	0	0		0		62	272	0	0	0	490.47	80.6	617.48	360	270	280	200	5	6	11.3	20.2
40	64	F	1	HCV	0	8	B	1	70.8	1	PSE before ET	14.8	EIS	1	3	2	0	0		0		63	274	0	0	0	734.1	78.3	749.43	330	300	225	190	8	7	4.8	15.3
41	65	F	1	NASH	1	6	A	0	106.2	1	PSE before ET	26	EIS	1	2	0	0	0		2		44	193	0	0	0	688.92	99	1084.06	220	-	110	-	6	6	3.9	39.7
42	66	M	0	Alc	1	7	B	1	61	1	PSE after ET	5.3	EVL	0	1	1	0	1	II	1	rupture	46	203	0	0	0	652	86.5	820.85	-	-	-	-	7	6	6.1	21.3
43	64	M	0	Alc	1	7	B	1	87.9	1	PSE before ET	13.8	EIS	1	2	2	0	0		0		52	228	0	0	0	778.86	87.9	874.03	410	275	305	155	8	5	3.6	13.8
44	61	F	1	HCV	0	6	A	0	59.5	1	PSE before ET	8	EIS	1	2	1	0	0		0		47	207	0	0	0	522.22	73.05	505.84	320	220	230	115	5	6	2.6	9
45	61	M	0	Alc	1	5	A	0	77.2	1	PSE before ET	10.9	EIS	1	2	2	1	1	II	0		44	195	0	0	0	573.6	81	626.7	330	280	210	190	5	5	4.5	13.2
